# Supplementary material for: Language prediction mechanisms in human auditory cortex
Source: PubMed Central journal article supplement (PMC7567874; doi:10.1038/s41467-020-19010-6), 2020-10-16
Supplement: 41467_2020_19010_MOESM1_ESM.pdf [file 41467_2020_19010_MOESM1_ESM.pdf]

# Evidence of Language Prediction Mechanisms in Human Auditory Cortex

Forseth et al.

A

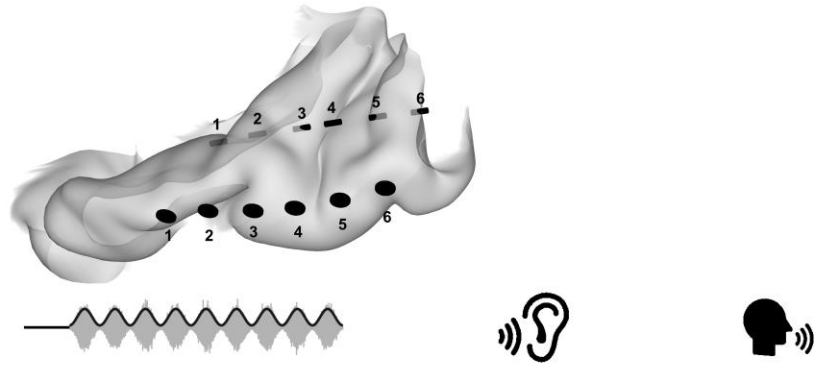

**B Stereotactic Depth Electrodes**

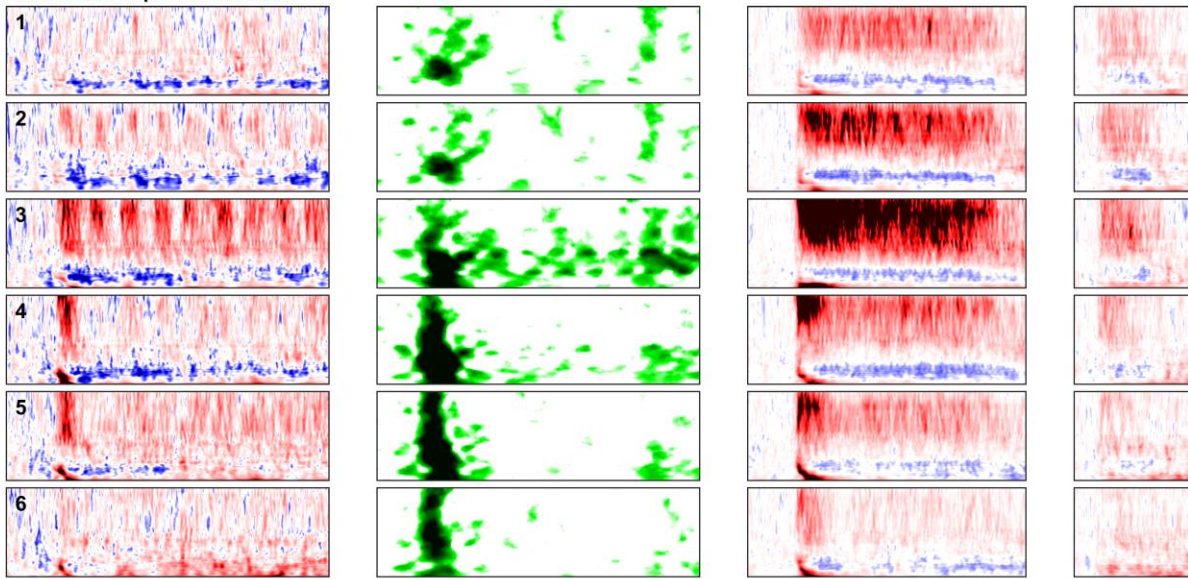

**C Subdural Grid Electrodes**

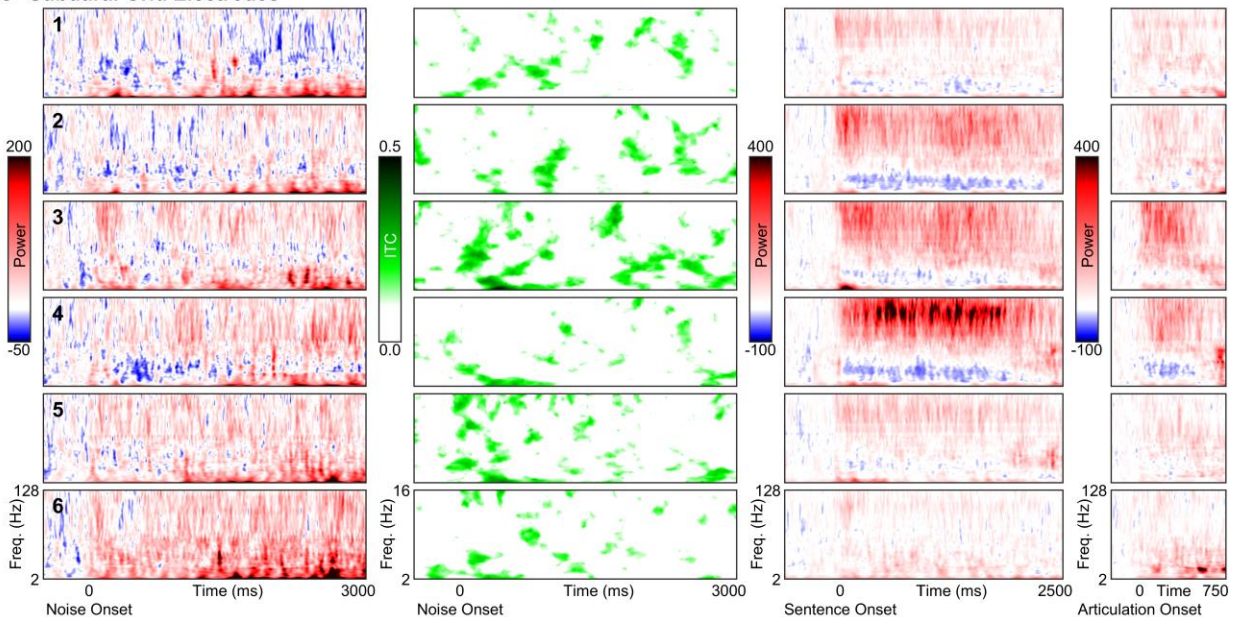

**Supplementary Figure 1: Individual Response at Depth and Surface Electrodes to Noise and Speech**  
 Single patient with two separate implants, one with depths & one with grids. **(A)** Electrodes matched by closest distance (<15mm), spanning planum polare through Heschl's gyrus to planum temporale. **(B, C)** Rows arranged from anterior (top) to posterior (bottom). First column, power during 3 Hz stimulus; second column, ITC during 3 Hz stimulus; third column, power during sentence listening; fourth column, power during articulation. The sustained response to noise in HG & the transient response in PT were only observed in depth electrodes – not at surface grid electrodes. Surface grid electrodes only responded to speech.

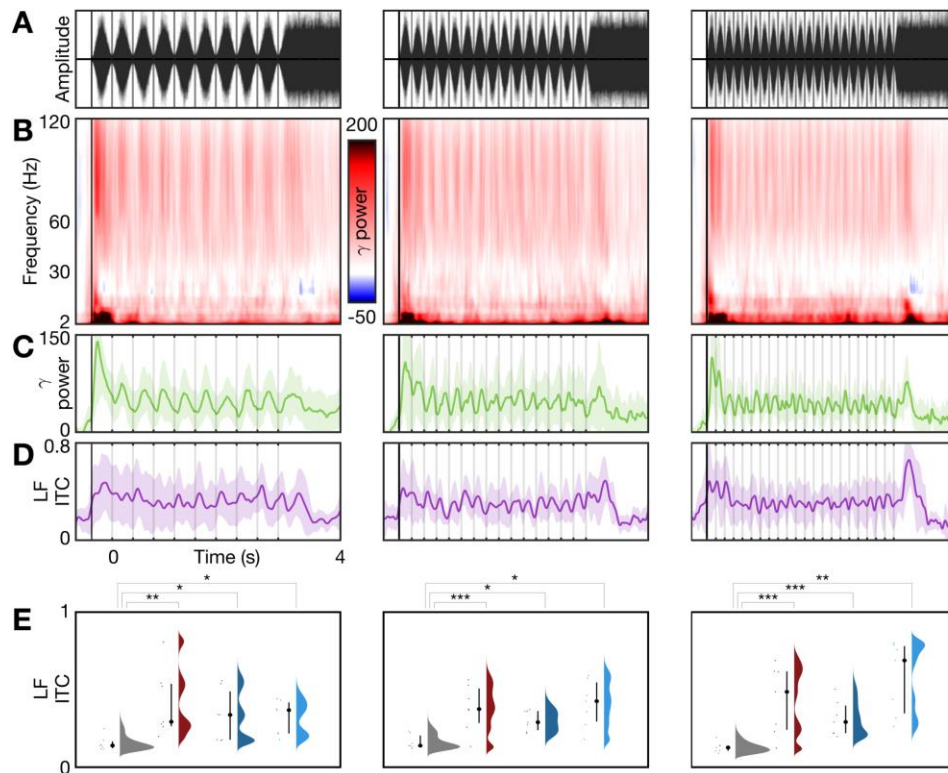

**Supplementary Figure 2: Sustained Oscillatory Response at 3, 5, and 7 Hz**

The sustained oscillatory response is not specific to a 3 Hz envelope. In 8 patients, we evaluated the sustained response to amplitude-modulated white noise at a range of frequencies: 3 Hz (left), 5 Hz (center), and 7 Hz (right). **(A)** The stimulus waveforms. **(B)** Group-average spectrograms, normalized to baseline, of electrodes in HG/TTS. **(C)** The average high-gamma power response. **(D)** The average low-frequency ITC. Shaded area represents  $\pm 1$  standard error of the mean. **(E)** Violin plots demonstrating the activity in low-frequency phase. Significance was evaluated at the group level using the Wilcoxon signed-rank test (\*  $p < 0.05$ , \*\*  $p < 0.01$ , \*\*\*  $p < 0.001$ ). There were significant increases in ITC relative to baseline in the initial, sustained, and post-oscillatory periods for 3 Hz ( $p = 0.0078$ ,  $p = 0.0391$ ,  $p = 0.0156$ ), 5 Hz ( $p < 10^{-3}$ ,  $p = 0.0156$ ,  $p = 0.0156$ ), and 7 Hz ( $p < 10^{-3}$ ,  $p < 10^{-3}$ ,  $p = 0.0078$ ) stimuli.

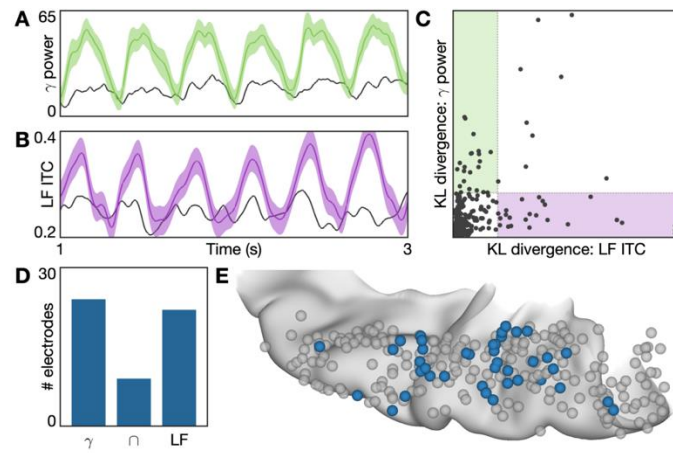

### Supplementary Figure 3: Kullback-Leibler Divergence Shows Separate Encodings for Power and Phase

The sustained response was primarily characterized by either rhythmic encoding of high-gamma power or low-frequency phase. We quantified the degree of rhythmicity in power and phase at each electrode as KL divergence from a uniform response. The mean population response of electrodes with a KL divergence of power (**A**) or phase (**B**) greater than 0.1 are shown in color (shaded area represents  $\pm 1$  standard error of the mean); the response of the opposite class (i.e. power response of electrodes with a high KL divergence of phase) is shown in black. (**C**) Scatterplot of power and phase divergence with thresholds indicated in colors matching panels A,B. (**D**) Most active electrodes were either high-gamma selective ( $n = 24$ ) or low-frequency phase selective ( $n = 22$ ); only 9 electrodes showed joint rhythmicity in power and phase. (**E**) Electrodes shown on a standard supratemporal atlas revealing a predominant distribution around Heschl's gyrus.

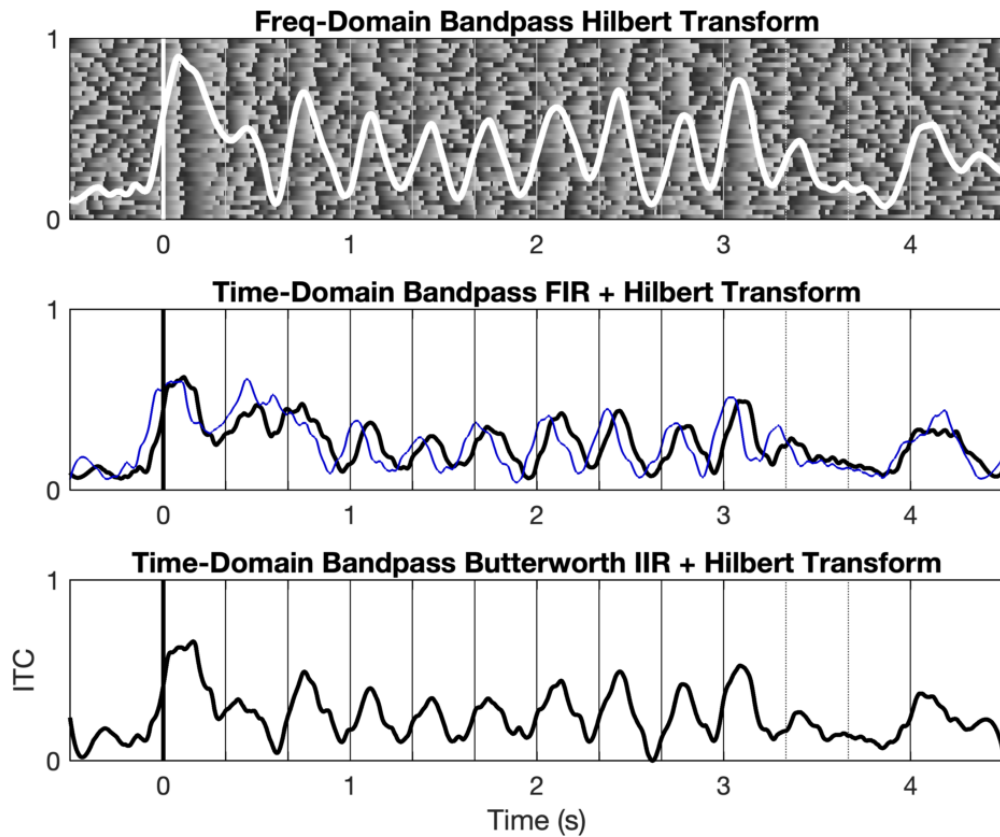

**Supplementary Figure 4: Filter Comparison**

Filter comparison at a single electrode in Heschl's gyrus demonstrating that the predictive effect is robust to filter design choice. Top row: Frequency domain bandpass Hilbert transform (used throughout manuscript). Background shows instantaneous phase for each trial in rows. Foreground traces shows inter-trial coherence (ITC) – the phase length at each time point across trials. Critically, the predictive effect can be seen at 3.33 – 3.66 seconds; an ITC increase despite the absence of any amplitude modulation. Middle row: Time domain FIR bandpass filter and Hilbert transform with both zero-phase acausal implementation (black trace) and right-filtered causal implementations (blue trace). The predictive effect survives in both designs; if this effect had been due to 'temporal smearing', applying a FIR filter on reversed time would eliminate the finding. Bottom row: Time domain zero-phase Butterworth (IIR) bandpass filter and Hilbert transform.



### Supplementary Table 1: Cortical Stimulation Mapping

PT: planum temporale; HG: Heschl's gyrus; TTS: transverse temporal sulcus; PP: planum polare

AN: auditory-cued naming; VN: visually-cued naming; AR: auditory repetition

#### Patient 1

| Contacts | mA | Location | Task | Result | Comments                                                                                                                                                                                                                                                                                                                                                                                                                                                                                                                             |
|----------|----|----------|------|--------|--------------------------------------------------------------------------------------------------------------------------------------------------------------------------------------------------------------------------------------------------------------------------------------------------------------------------------------------------------------------------------------------------------------------------------------------------------------------------------------------------------------------------------------|
| A15-16   | 6  | PT       | AN   | +      | <p>"I feel like there's other people talking."</p> <p>"There's something weird, somebody's talking, or there's stuff going on around me."</p> <p>"I'm feeling like there's something else going on over here (<i>gesturing to the right</i>). I almost feel like someone else was talking, other than you talking." (Like you're hearing something?) "Like I'm hearing someone else." (That only occurs when I stimulate you?) "Only when you stimulate." (You think you can hear through it?) "That's what I was trying to do."</p> |
| A13-14   | 2  | PT       | AN   | +      | <p>(What?) "People are feeling wicked ... people talking ... wishy-washy ... wicky-wacky ... what is that?" (Is it still there?) "People aren't talking like they were."</p> <p>(So what did you feel? Tell me about it.) "I felt – not shock like a pain, but a shock like a little vibrate. And then it felt like something was like 'what-cha-ma-call-it' was the word, and then kind of like ... an echo, and then just kind of like a rolling of ... more words, but nothing specific."</p>                                     |
| A11-12   | 2  | PT       |      |        | "There's people talking all around me."                                                                                                                                                                                                                                                                                                                                                                                                                                                                                              |
| A9-10    | 1  | HG/TTS   |      |        | ( <i>gesturing to the right</i> ) (But it's getting less intense?) "A little less intense, yeah, like walking in a mall right now. Before it was like a ballpark."                                                                                                                                                                                                                                                                                                                                                                   |
| A7-8     | 6  | HG       | AR   | +      |                                                                                                                                                                                                                                                                                                                                                                                                                                                                                                                                      |
| A7-8     | 6  | HG       | AN   | +      |                                                                                                                                                                                                                                                                                                                                                                                                                                                                                                                                      |
| A7-8     | 6  | HG       | VN   | -      |                                                                                                                                                                                                                                                                                                                                                                                                                                                                                                                                      |
| A8-9     | 2  | HG       | AR   | +      | "I hear something there."                                                                                                                                                                                                                                                                                                                                                                                                                                                                                                            |
| A8-9     | 2  | HG       | AN   | +      |                                                                                                                                                                                                                                                                                                                                                                                                                                                                                                                                      |
| A8-9     | 2  | HG       | VN   | -      |                                                                                                                                                                                                                                                                                                                                                                                                                                                                                                                                      |
| A5-6     | 5  | PP       | AR   | +      |                                                                                                                                                                                                                                                                                                                                                                                                                                                                                                                                      |
| A5-6     | 5  | PP       | AN   | +      |                                                                                                                                                                                                                                                                                                                                                                                                                                                                                                                                      |
| A5-6     | 5  | PP       | VN   | +      |                                                                                                                                                                                                                                                                                                                                                                                                                                                                                                                                      |
| A3-4     | 5  | PP       | AR   | +      | "Weird." (Why did you say weird? What happened?) "I heard what she said and then it just ... devolved ... just went away. Just like the words just crumbled away."                                                                                                                                                                                                                                                                                                                                                                   |
| A3-4     | 5  | PP       | AN   | +      |                                                                                                                                                                                                                                                                                                                                                                                                                                                                                                                                      |
| A3-4     | 5  | PP       | VN   | -      |                                                                                                                                                                                                                                                                                                                                                                                                                                                                                                                                      |
| B9-10    | 5  | pl-STG   | AR   | -      |                                                                                                                                                                                                                                                                                                                                                                                                                                                                                                                                      |
| B9-10    | 5  | pl-STG   | AN   | -      |                                                                                                                                                                                                                                                                                                                                                                                                                                                                                                                                      |
| B9-10    | 5  | pl-STG   | VN   | -      |                                                                                                                                                                                                                                                                                                                                                                                                                                                                                                                                      |
| C9-10    | 4  | ml-STG   | AR   | -      |                                                                                                                                                                                                                                                                                                                                                                                                                                                                                                                                      |
| C9-10    | 4  | ml-STG   | AN   | -      |                                                                                                                                                                                                                                                                                                                                                                                                                                                                                                                                      |
| C9-10    | 4  | ml-STG   | VN   | -      |                                                                                                                                                                                                                                                                                                                                                                                                                                                                                                                                      |
| D9-10    | 4  | al-STG   | AR   | -      |                                                                                                                                                                                                                                                                                                                                                                                                                                                                                                                                      |
| D9-10    | 4  | al-STG   | AN   | -      |                                                                                                                                                                                                                                                                                                                                                                                                                                                                                                                                      |
| D9-10    | 4  | al-STG   | VN   | -      |                                                                                                                                                                                                                                                                                                                                                                                                                                                                                                                                      |

Patient 2

| Contacts | mA | Location | Task | Result | Comments                                                                                                                                                                                                                                    |
|----------|----|----------|------|--------|---------------------------------------------------------------------------------------------------------------------------------------------------------------------------------------------------------------------------------------------|
| A1-2     | 5  | PP       | AR   | -      |                                                                                                                                                                                                                                             |
| A1-2     | 5  | PP       | AN   | -      |                                                                                                                                                                                                                                             |
| A1-2     | 5  | PP       | VN   | -      |                                                                                                                                                                                                                                             |
| A3-4     | 5  | PP       | AR   | -      |                                                                                                                                                                                                                                             |
| A3-4     | 5  | PP       | AN   | -      |                                                                                                                                                                                                                                             |
| A3-4     | 5  | PP       | VN   | -      |                                                                                                                                                                                                                                             |
| A5-6     | 5  | PP       | AR   | -      |                                                                                                                                                                                                                                             |
| A5-6     | 5  | PP       | AN   | -      |                                                                                                                                                                                                                                             |
| A5-6     | 5  | PP       | VN   | -      |                                                                                                                                                                                                                                             |
| A7-8     | 5  | PP       | AR   | -      |                                                                                                                                                                                                                                             |
| A7-8     | 5  | PP       | AN   | -      |                                                                                                                                                                                                                                             |
| A7-8     | 5  | PP       | VN   | -      |                                                                                                                                                                                                                                             |
| A9-10    | 5  | PP/HG    | AR   | +      |                                                                                                                                                                                                                                             |
| A9-10    | 5  | PP/HG    | AN   | +      |                                                                                                                                                                                                                                             |
| A9-10    | 5  | PP/HG    | VN   | -      |                                                                                                                                                                                                                                             |
| A10-11   | 4  | HG       |      |        | "Yeah, yeah. Did someone say something [incomprehensible] right now?" (Are you hearing something?) "Yeah. It's kind of like a ringing in my ear."                                                                                           |
| A10-11   | 4  | HG       | AR   | +      | "Kind of had a ringing in your ear. Not normal, something like ..." (Does it affect your ability to hear [the question]?) "A little bit, or maybe putting the words together."                                                              |
| A10-11   | 4  | HG       | VN   | -      |                                                                                                                                                                                                                                             |
| A11-12   | 2  | HG       |      |        | "That was like a really bad echo I was hearing just now. It's a really bad echo, almost like you're talking in a cave or something."                                                                                                        |
| A11-12   | 2  | HG       | AR   | +      | "It's [the echo] really bad."                                                                                                                                                                                                               |
| A11-12   | 2  | HG       | VN   | -      |                                                                                                                                                                                                                                             |
| A12-13   | 1  | HG/PT    |      |        | "Yeah, that's bad. The hearing on that is bad." (Is it worse than before, the echo?) "It was up there. It's very bad."<br>(Still getting the echo?) "Really bad."                                                                           |
| A13-14   | 1  | PT       |      |        | "That's really bad. It's similar to the other one. A very quiet echo." (A little different in frequency?) "Yes, lower."<br>(What do you feel?) "It feels like you're going underwater, when you're underwater with the water in your ears." |
| A14-15   | 1  | PT       |      |        | "That's really bad. That's similar to the previous one."<br>"I can barely hear anything."                                                                                                                                                   |
| A15-16   | 1  | PT       |      |        | "It's a bad one."                                                                                                                                                                                                                           |
| C9-10    | 5  | ml-STG   | AR   | -      |                                                                                                                                                                                                                                             |
| C9-10    | 5  | ml-STG   | AN   | -      |                                                                                                                                                                                                                                             |
| C9-10    | 5  | ml-STG   | VN   | -      |                                                                                                                                                                                                                                             |
| D10-11   | 5  | al-STG   | AR   | -      |                                                                                                                                                                                                                                             |
| D10-11   | 5  | al-STG   | AN   | -      |                                                                                                                                                                                                                                             |
| D10-11   | 5  | al-STG   | VN   | -      |                                                                                                                                                                                                                                             |

## Patient 3

| Contacts | mA | Location | Task | Result | Comments                                                                                                                                                                                        |
|----------|----|----------|------|--------|-------------------------------------------------------------------------------------------------------------------------------------------------------------------------------------------------|
| A1-2     | 7  | PP       | AR   | -      |                                                                                                                                                                                                 |
|          | 7  | PP       | AN   | -      |                                                                                                                                                                                                 |
|          | 7  | PP       | VN   | -      |                                                                                                                                                                                                 |
| A4-5     | 7  | PP       | AR   | +      |                                                                                                                                                                                                 |
|          | 7  | PP       | AN   | +      |                                                                                                                                                                                                 |
|          | 7  | PP       | VN   | -      |                                                                                                                                                                                                 |
| A6-7     | 7  | HG       | AR   | +      |                                                                                                                                                                                                 |
|          | 7  | HG       | VN   | -      |                                                                                                                                                                                                 |
| A8-9     | 5  | HG       | AR   | -      |                                                                                                                                                                                                 |
|          | 5  | HG       | AN   | -      |                                                                                                                                                                                                 |
|          | 5  | HG       | VN   | -      |                                                                                                                                                                                                 |
| A10-11   | 3  | HG/TTS   |      |        | (patient startles) (Did you hear anything?) "I felt a shock or ..." (Was it a shock or was it a sound?) "It was like a 'brrrrr', I can't tell if it's shocking me or what."                     |
|          | 3  | HG/TTS   | AR   | -      |                                                                                                                                                                                                 |
|          | 3  | HG/TTS   | AN   | -      |                                                                                                                                                                                                 |
|          | 3  | HG/TTS   | VN   | -      |                                                                                                                                                                                                 |
| A12-13   | 3  | PT       |      |        | (patient startles) (Was it the sound again? The buzzing again?) "Yeah. I could still hear you talking, though." (You could still hear me talking?) "It's like ... it starts off with 'brrrrr.'" |
|          | 3  | PT       | AR   | -      | (speaking very loudly)                                                                                                                                                                          |
|          | 3  | PT       | AN   | -      | (speaking very loudly)                                                                                                                                                                          |
|          | 3  | PT       | VN   | -      | (speaking very loudly)                                                                                                                                                                          |
| A14-15   | 7  | PT       |      |        | (You hear anything?) "I can hear it." (Is it as much as before?) "No, it wasn't near as ..." (Ok, good. How was that?) "I can still hear you talk."                                             |
|          | 7  | PT       | AR   | +      | (speaking very loudly)                                                                                                                                                                          |
|          | 7  | PT       | AN   | +      | (speaking very loudly)                                                                                                                                                                          |
|          | 7  | PT       | VN   | +      | (speaking very loudly)                                                                                                                                                                          |
| B12-13   | 7  | pl-STG   | AR   | +      |                                                                                                                                                                                                 |
|          | 7  | pl-STG   | AN   | +      |                                                                                                                                                                                                 |
|          | 7  | pl-STG   | VN   | +      |                                                                                                                                                                                                 |
| C11-12   | 7  | ml-STG   | AR   | -      |                                                                                                                                                                                                 |
|          | 7  | ml-STG   | AN   | -      |                                                                                                                                                                                                 |
|          | 7  | ml-STG   | VN   | -      |                                                                                                                                                                                                 |
| D11-12   | 7  | al-STG   | AR   | -      |                                                                                                                                                                                                 |
|          | 7  | al-STG   | AN   | -      |                                                                                                                                                                                                 |
|          | 7  | al-STG   | VN   | -      |                                                                                                                                                                                                 |
